# Supplementary material for: Covalent doping of Ni and P on 1T-enriched MoS2 bifunctional 2D-nanostructures with active basal planes and expanded interlayers boosts electrocatalytic water splitting
Source: Royal Society of Chemistry journal article supplement (doi:10.1039/d0ta05865c), 2020-01-01
Supplement: d0ta05865c1.pdf [file d0ta05865c1.pdf]

## **Electronic Supplementary Information (ESI<sup>†</sup>)**

### **Covalent-doping of Ni and P for 1T-enriched MoS<sub>2</sub> bifunctional 2D-nanostructures with active basal planes and expanded interlayers boosting electrocatalytic water splitting**

Uday Narayan Pan<sup>a</sup>, Thangjam Ibomcha Singh<sup>a</sup>, Dasu Ram Paudel<sup>a</sup>, Chandan Chandru

Gudal<sup>a</sup>, Nam Hoon Kim<sup>a\*</sup>, Joong Hee Lee<sup>a,b\*</sup>

<sup>a</sup>Advanced Materials Institute of BIN Convergence Technology (BK21 Plus Global) and Department of BIN Convergence Technology, Jeonbuk National University, Jeonju, Jeonbuk, 54896, Republic of Korea.

<sup>b</sup>Carbon Composite Research Centre, Department of Polymer-Nano Science and Technology, Jeonbuk National University, Jeonju, Jeonbuk, 54896, Republic of Korea.

**Materials:** sodium molybdate dihydrate [Na<sub>2</sub>MoO<sub>4</sub>·2H<sub>2</sub>O], nickel(II) acetate tetrahydrate [Ni(OCOCH<sub>3</sub>)<sub>2</sub>·4H<sub>2</sub>O], L-Cysteine [HSCH<sub>2</sub>CH(NH<sub>2</sub>)CO<sub>2</sub>H] and sodium phosphate monobasic [NaH<sub>2</sub>PO<sub>4</sub>] were purchased from Sigma-Aldrich, USA. KOH (potassium hydroxide) was procured from Samchun Chemical Co. Ltd, South Korea. Carbon cloth (CC) was obtained from Hesenbio Ltd. Shanghai, China. Obtained chemicals were then directly used for the synthesis of the catalysts (no further purifications were done)

**Instruments:** JEOL-JSM-6701F field emission scanning electron microscope was used for acquiring the FE-SEM images of all the samples. Jeol-JEM-2200 transmission electron microscope was used for acquiring TEM images, high-resolution TEM images and scanning TEM images of all the samples. X-ray photoelectron spectroscopic study of the samples was done using a Theta Probe X-ray photoelectron spectrometer (Maker: Thermo Fisher Scientific Inc., UK). Micromeritics-ASAP 2020 surface area and porosity analyzer was used for nitrogen adsorption–desorption study. Powder X-ray diffraction pattern of all the samples were obtained using Rigaku TTRX3 powder X-ray diffractometer. Electrochemical performances were measured using an electrochemical workstation CH660E (maker: CH Instruments, Inc., USA). Electrochemical impedance spectroscopic measurements were done using the same electrochemical workstation with AC voltage of amplitude 5 mV in frequency range 0.01 Hz to 100 kHz. The elemental compositions of the prepared samples were determined from inductively coupled plasma-optical emission spectrometry elemental (ICP-OES) and atomic absorption spectroscopy (AAS) measurements

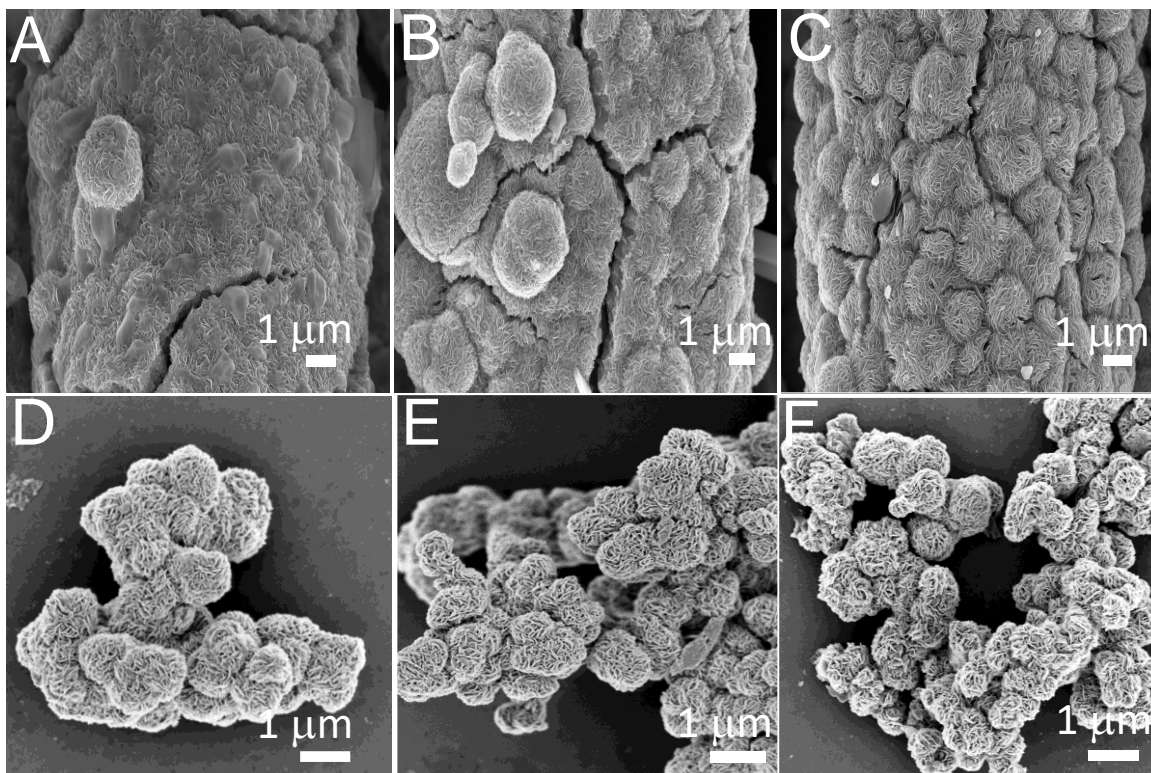

**Fig. S1.** FE-SEM image of (A) MoS<sub>2</sub> (B) Ni-doped and intercalated MoS<sub>2</sub> (C) P-doped MoS<sub>2</sub> nanosheets grown on carbon cloth. FE-SEM image of (D) MoS<sub>2</sub> (E) Ni-doped and intercalated MoS<sub>2</sub> (F) P-doped MoS<sub>2</sub> nanoflowers.

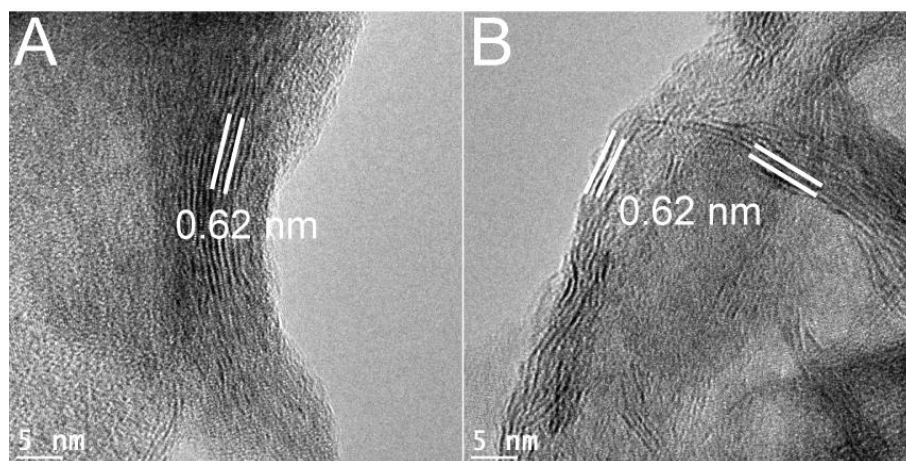

**Fig. S2.** TEM images of the pristine MoS<sub>2</sub> showing interlayer spacing.

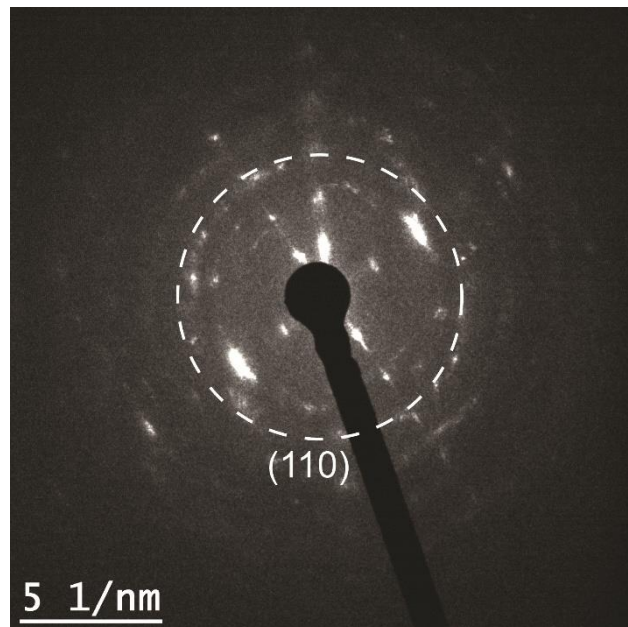

**Fig. S3.** Selected area electron diffraction (SAED) pattern of the 1T-Ni<sub>0.2</sub>Mo<sub>0.8</sub>S<sub>1.8</sub>P<sub>0.2</sub> NFs.

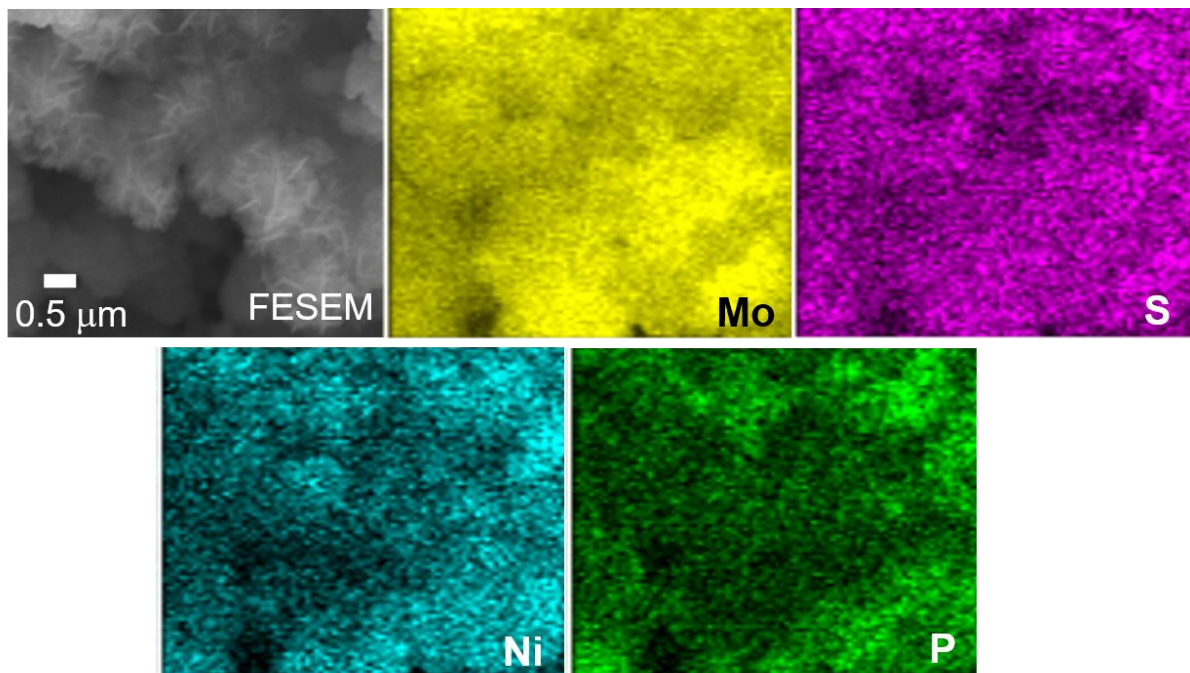

**Fig. S4.** FE-SEM-EDS elemental mapping of 1T-Ni<sub>0.2</sub>Mo<sub>0.8</sub>S<sub>1.8</sub>P<sub>0.2</sub> NFs.

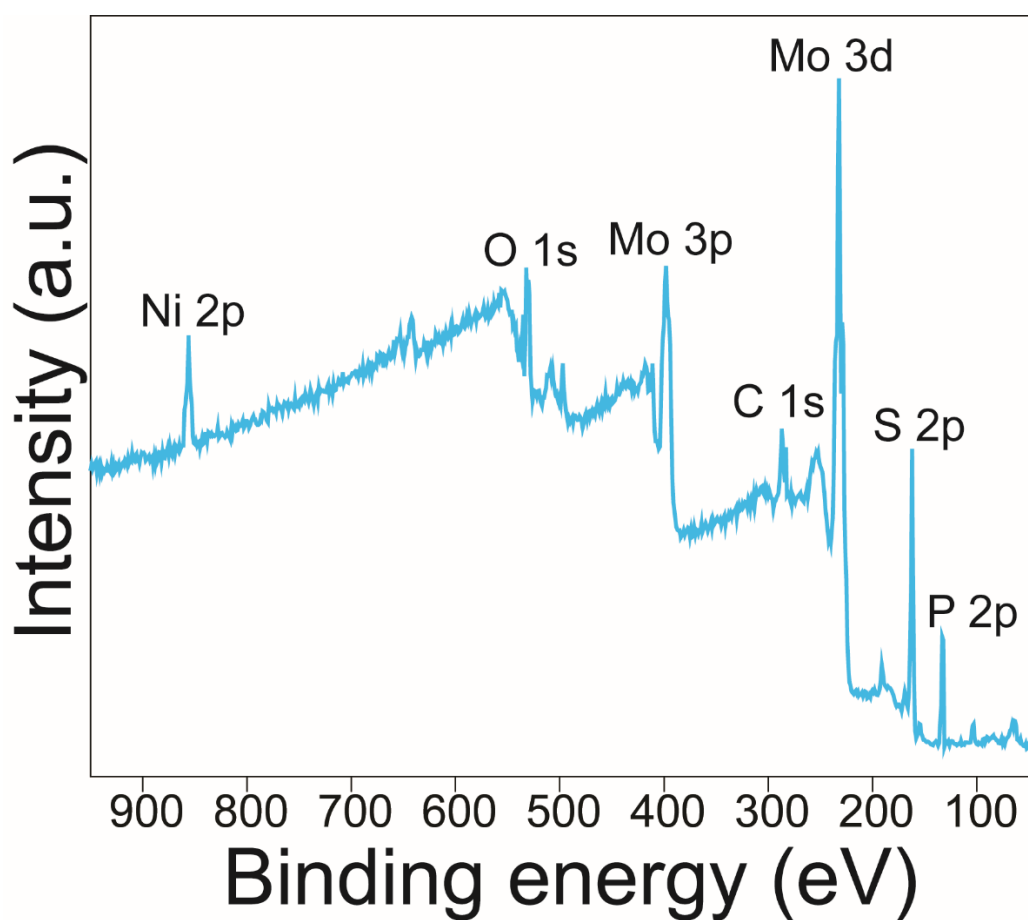

**Fig. S5.** XPS survey spectrum of 1T-Ni<sub>0.2</sub>Mo<sub>0.8</sub>S<sub>1.8</sub>P<sub>0.2</sub> NFs.

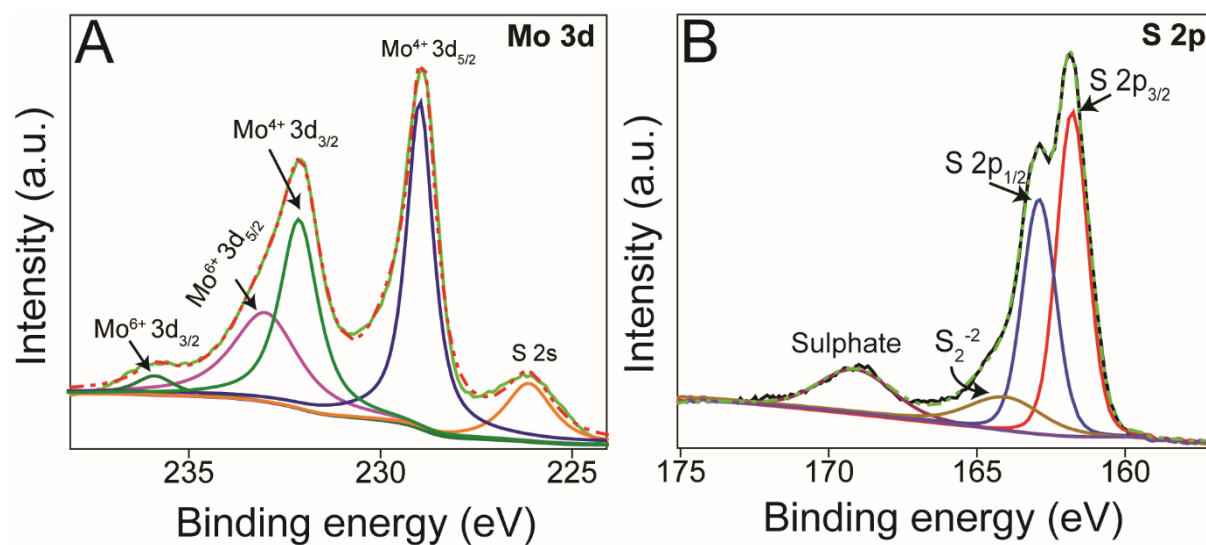

**Fig. S6.** High resolution X-ray photoelectron spectroscopy (XPS) plot of (A) Mo 3d and (B)

S 2p for the pristine MoS<sub>2</sub>.

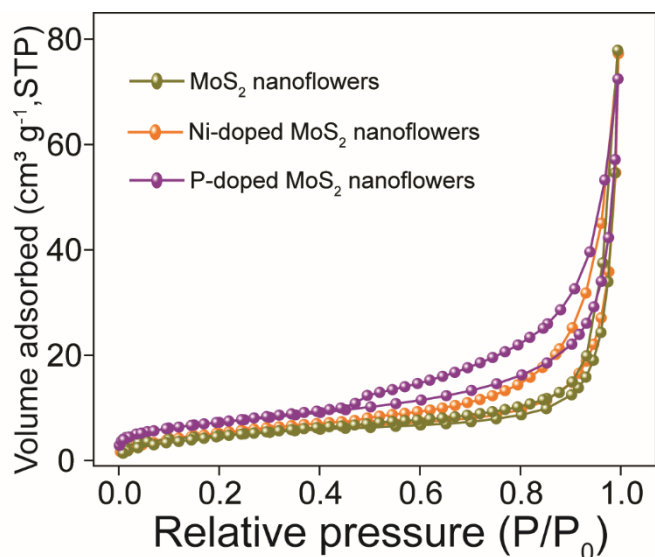

**Fig. S7.** N<sub>2</sub> adsorption-desorption isotherms of MoS<sub>2</sub>, Ni-doped and intercalated MoS<sub>2</sub> and P-doped MoS<sub>2</sub> nanoflowers.

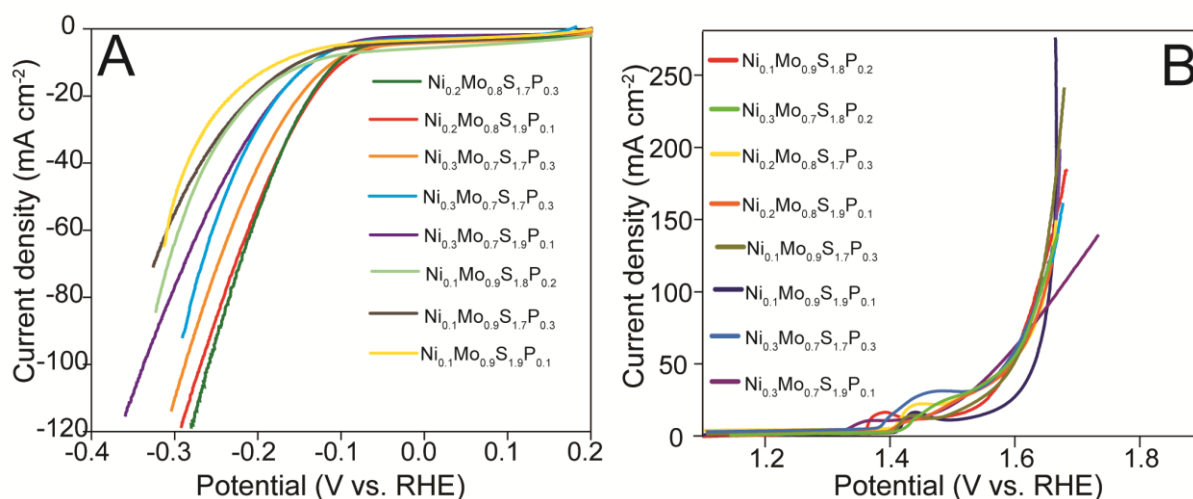

**Fig. S8.** (A) Linear-sweep voltammetry (LSV) measurements for hydrogen evolution reaction (HER) of Ni<sub>0.1</sub>Mo<sub>0.9</sub>S<sub>1.8</sub>P<sub>0.2</sub>, Ni<sub>0.3</sub>Mo<sub>0.7</sub>S<sub>1.8</sub>P<sub>0.2</sub>, Ni<sub>0.2</sub>Mo<sub>0.8</sub>S<sub>1.7</sub>P<sub>0.3</sub>, Ni<sub>0.2</sub>Mo<sub>0.8</sub>S<sub>1.9</sub>P<sub>0.1</sub>, Ni<sub>0.1</sub>Mo<sub>0.9</sub>S<sub>1.7</sub>P<sub>0.3</sub>, Ni<sub>0.1</sub>Mo<sub>0.9</sub>S<sub>1.9</sub>P<sub>0.1</sub>, Ni<sub>0.3</sub>Mo<sub>0.7</sub>S<sub>1.7</sub>P<sub>0.3</sub>, Ni<sub>0.3</sub>Mo<sub>0.7</sub>S<sub>1.9</sub>P<sub>0.1</sub> and (B) Linear-sweep voltammetry (LSV) measurements towards oxygen evolution reaction (OER) of Ni<sub>0.1</sub>Mo<sub>0.9</sub>S<sub>1.8</sub>P<sub>0.2</sub>, Ni<sub>0.3</sub>Mo<sub>0.7</sub>S<sub>1.8</sub>P<sub>0.2</sub>, Ni<sub>0.2</sub>Mo<sub>0.8</sub>S<sub>1.7</sub>P<sub>0.3</sub>, Ni<sub>0.2</sub>Mo<sub>0.8</sub>S<sub>1.9</sub>P<sub>0.1</sub>, Ni<sub>0.1</sub>Mo<sub>0.9</sub>S<sub>1.7</sub>P<sub>0.3</sub>, Ni<sub>0.1</sub>Mo<sub>0.9</sub>S<sub>1.9</sub>P<sub>0.1</sub>, Ni<sub>0.3</sub>Mo<sub>0.7</sub>S<sub>1.7</sub>P<sub>0.3</sub>, Ni<sub>0.3</sub>Mo<sub>0.7</sub>S<sub>1.9</sub>P<sub>0.1</sub>.

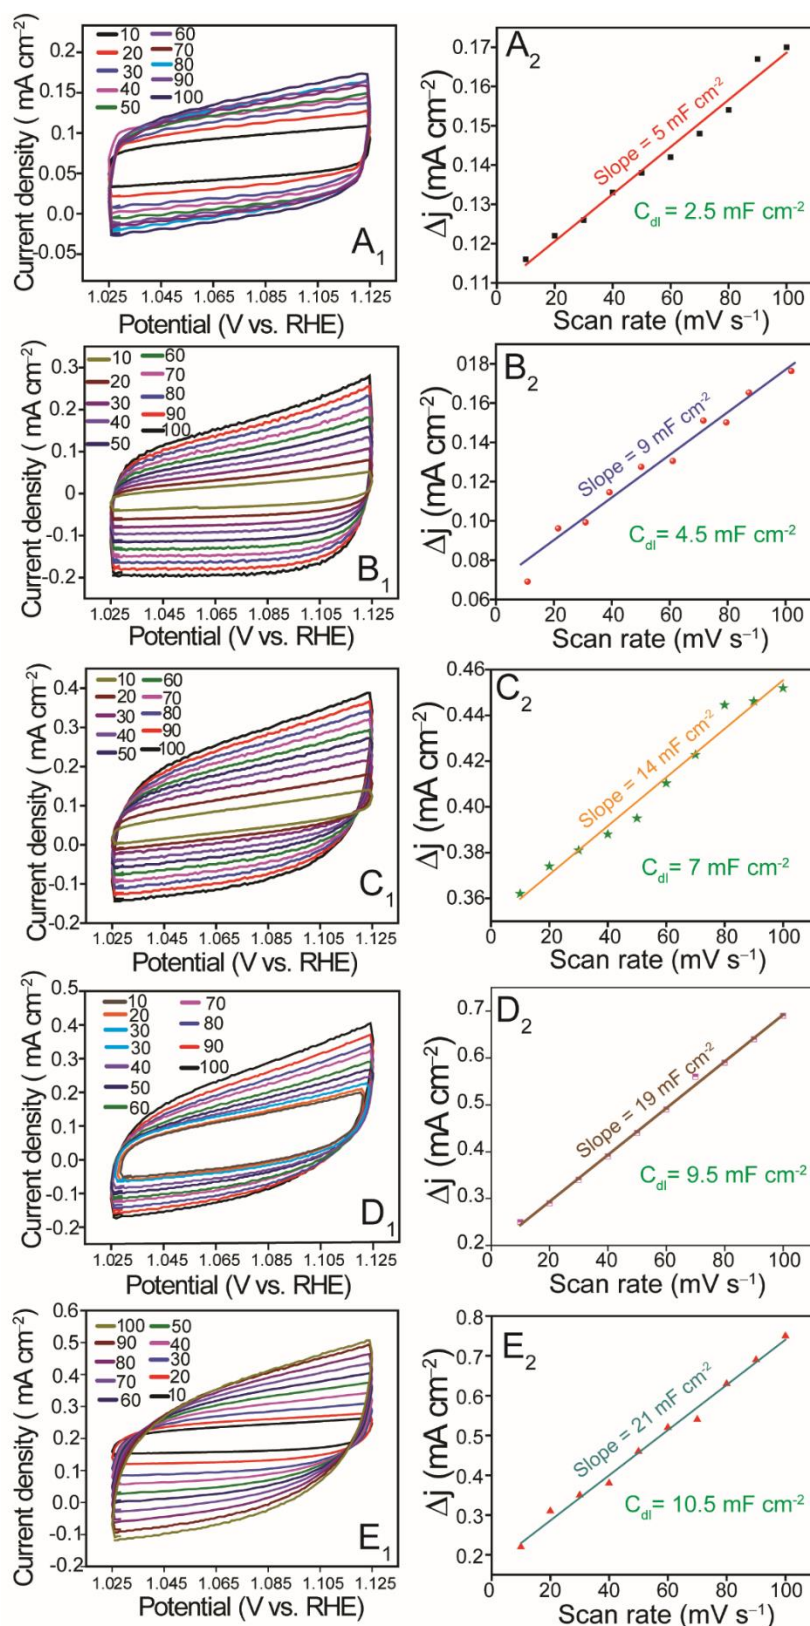

**Fig. S9.** Cyclic voltammograms at different scan rates of (A<sub>1</sub>) MoS<sub>2</sub> (B<sub>1</sub>) P-doped MoS<sub>2</sub> (C<sub>1</sub>) Ni-doped MoS<sub>2</sub> (D<sub>1</sub>) 1T-Ni<sub>0.2</sub>Mo<sub>0.8</sub>S<sub>1.8</sub>P<sub>0.2</sub> NFs (E<sub>1</sub>) 1T-Ni<sub>0.2</sub>Mo<sub>0.8</sub>S<sub>1.8</sub>P<sub>0.2</sub> NS/CC. Corresponding scan rate dependent current densities of (A<sub>2</sub>) MoS<sub>2</sub> (B<sub>2</sub>) P-doped MoS<sub>2</sub> (C<sub>2</sub>) Ni-doped MoS<sub>2</sub> (D<sub>2</sub>) 1T-Ni<sub>0.2</sub>Mo<sub>0.8</sub>S<sub>1.8</sub>P<sub>0.2</sub> NFs (E<sub>2</sub>) 1T-Ni<sub>0.2</sub>Mo<sub>0.8</sub>S<sub>1.8</sub>P<sub>0.2</sub> NS/CC.

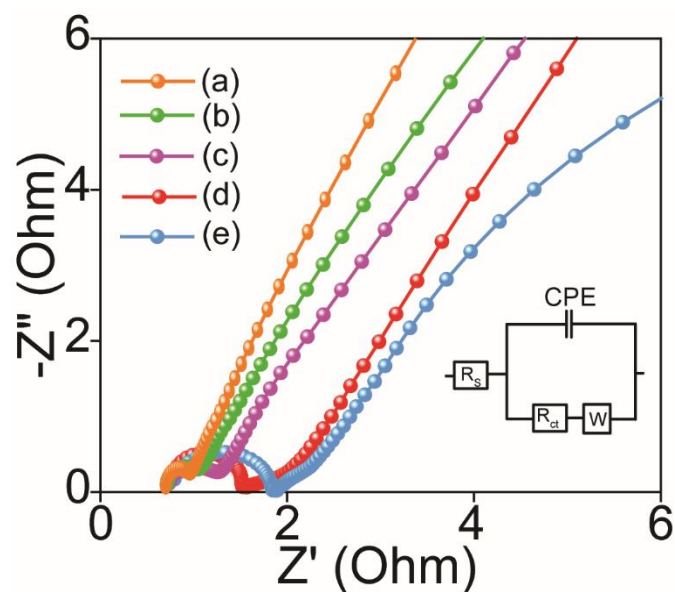

**Fig. S10.** Spectra of (a) 1T-Ni<sub>0.2</sub>Mo<sub>0.8</sub>S<sub>1.8</sub>P<sub>0.2</sub> NS/CC (b) 1T-Ni<sub>0.2</sub>Mo<sub>0.8</sub>S<sub>1.8</sub>P<sub>0.2</sub> NFs (c) Ni-doped MoS<sub>2</sub> (d) P-doped MoS<sub>2</sub> (e) MoS<sub>2</sub>.

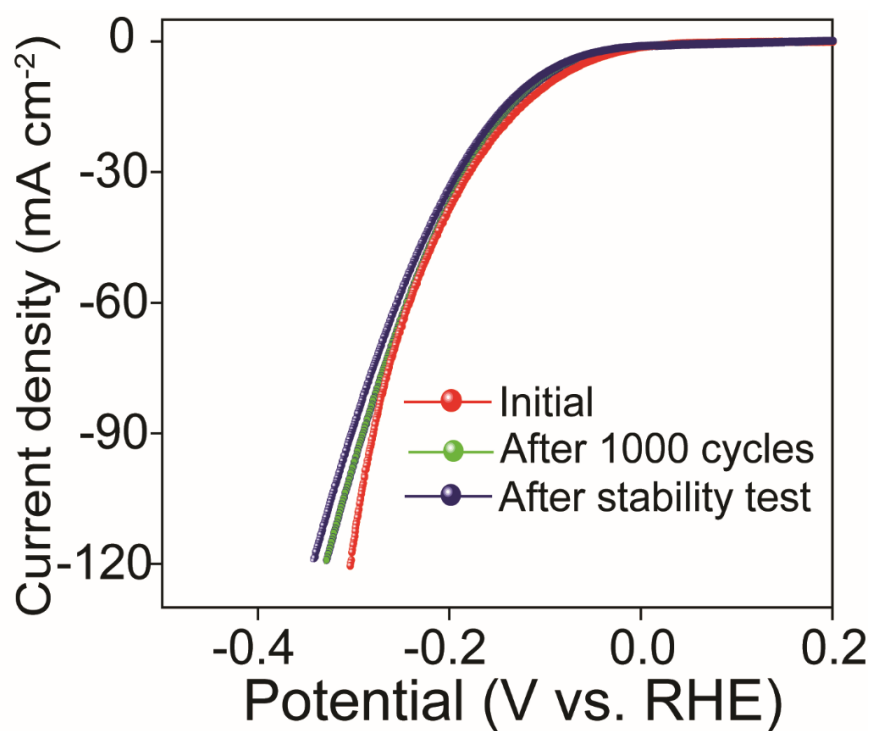

**Fig. S11.** Linear-sweep voltammetry (LSV) measurements towards hydrogen evolution reaction of 1T-Ni<sub>0.2</sub>Mo<sub>0.8</sub>S<sub>1.8</sub>P<sub>0.2</sub> NFs before and after chronopotentiometric stability test and 1,000 consecutive CV cycles.



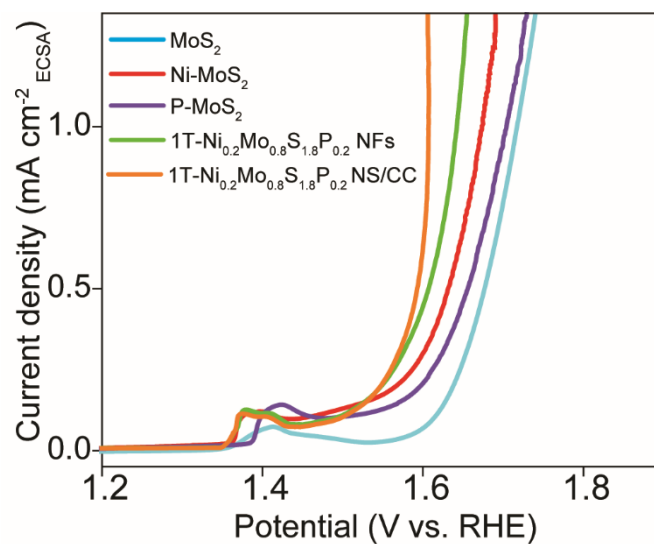

**Fig. S12.** ECSA normalized Linear-sweep voltammetry (LSV) measurements towards oxygen evolution reaction (OER) of MoS<sub>2</sub>, P-doped MoS<sub>2</sub>, Ni-doped MoS<sub>2</sub>, 1T-Ni<sub>0.2</sub>Mo<sub>0.8</sub>S<sub>1.8</sub>P<sub>0.2</sub> NFs and 1T-Ni<sub>0.2</sub>Mo<sub>0.8</sub>S<sub>1.8</sub>P<sub>0.2</sub> NS/CC.

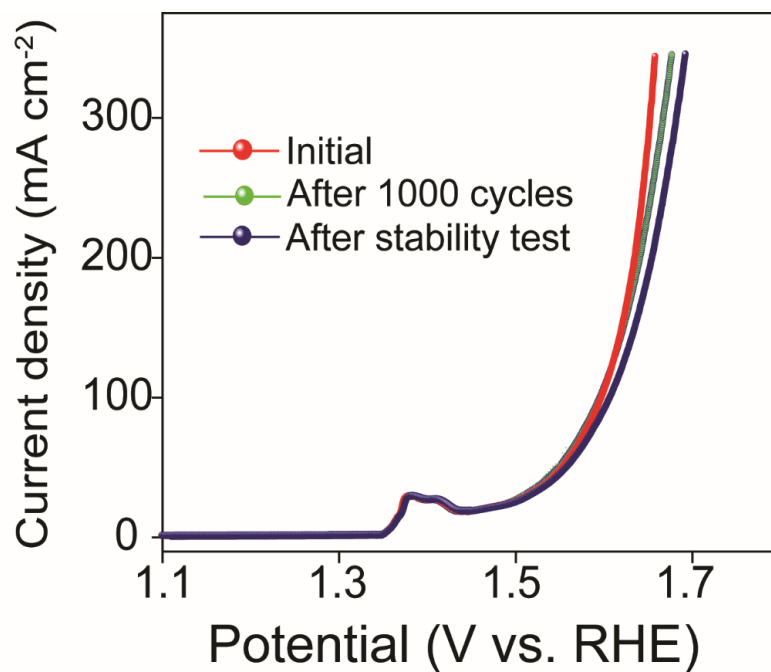

**Fig. S13.** Linear-sweep voltammetry (LSV) measurements towards oxygen evolution reaction of 1T-Ni<sub>0.2</sub>Mo<sub>0.8</sub>S<sub>1.8</sub>P<sub>0.2</sub> NFs after chronopotentiometric stability test and 1,000 consecutive CV cycles.

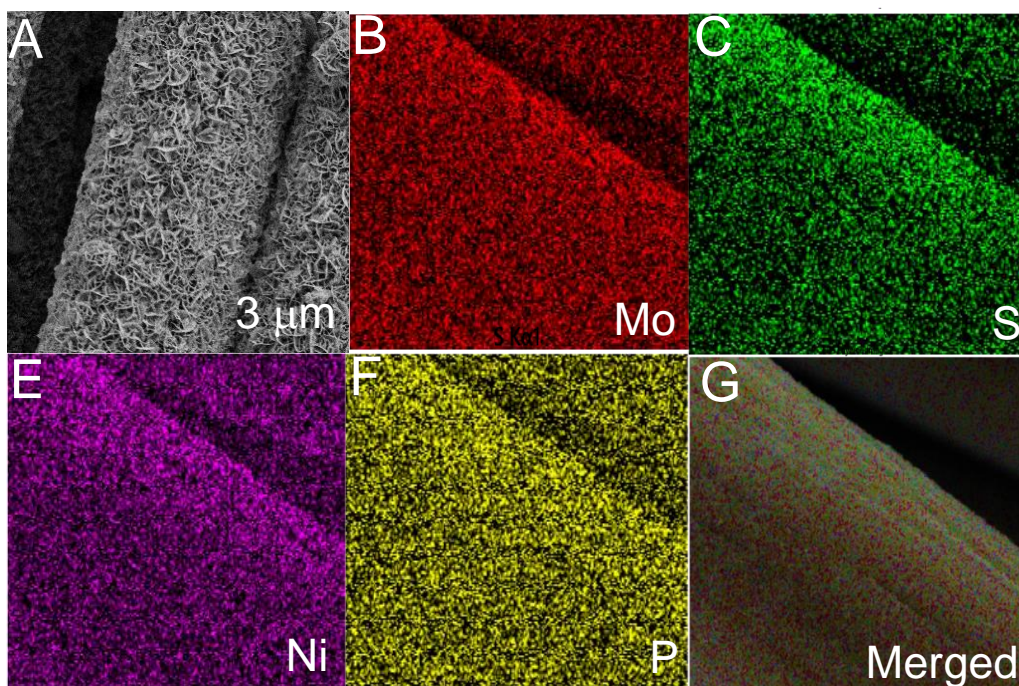

**Fig. S14.** (A) FESEM image. (B-G) Elemental mapping corresponding to Mo, S, Ni and P, respectively of 1T-Ni<sub>0.2</sub>Mo<sub>0.8</sub>S<sub>1.8</sub>P<sub>0.2</sub> NS/CC after long-term chronoamperometric stability test of the device showing no significant change in the structure and elemental composition of the catalyst.

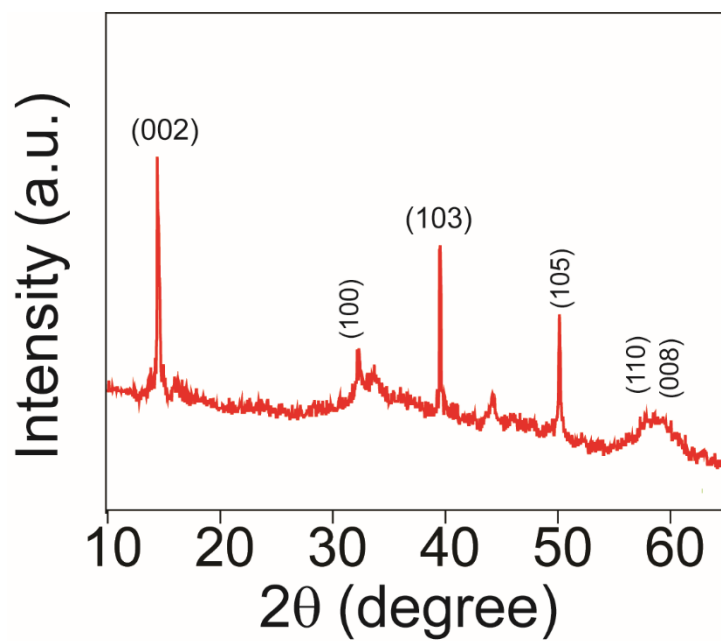

**Fig. S15.** X-ray powder diffraction (XRD) pattern of 1T-Ni<sub>0.2</sub>Mo<sub>0.8</sub>S<sub>1.8</sub>P<sub>0.2</sub> after long-term chronoamperometric stability test of the device showing no significant change in the crystallographic nature of the catalyst.

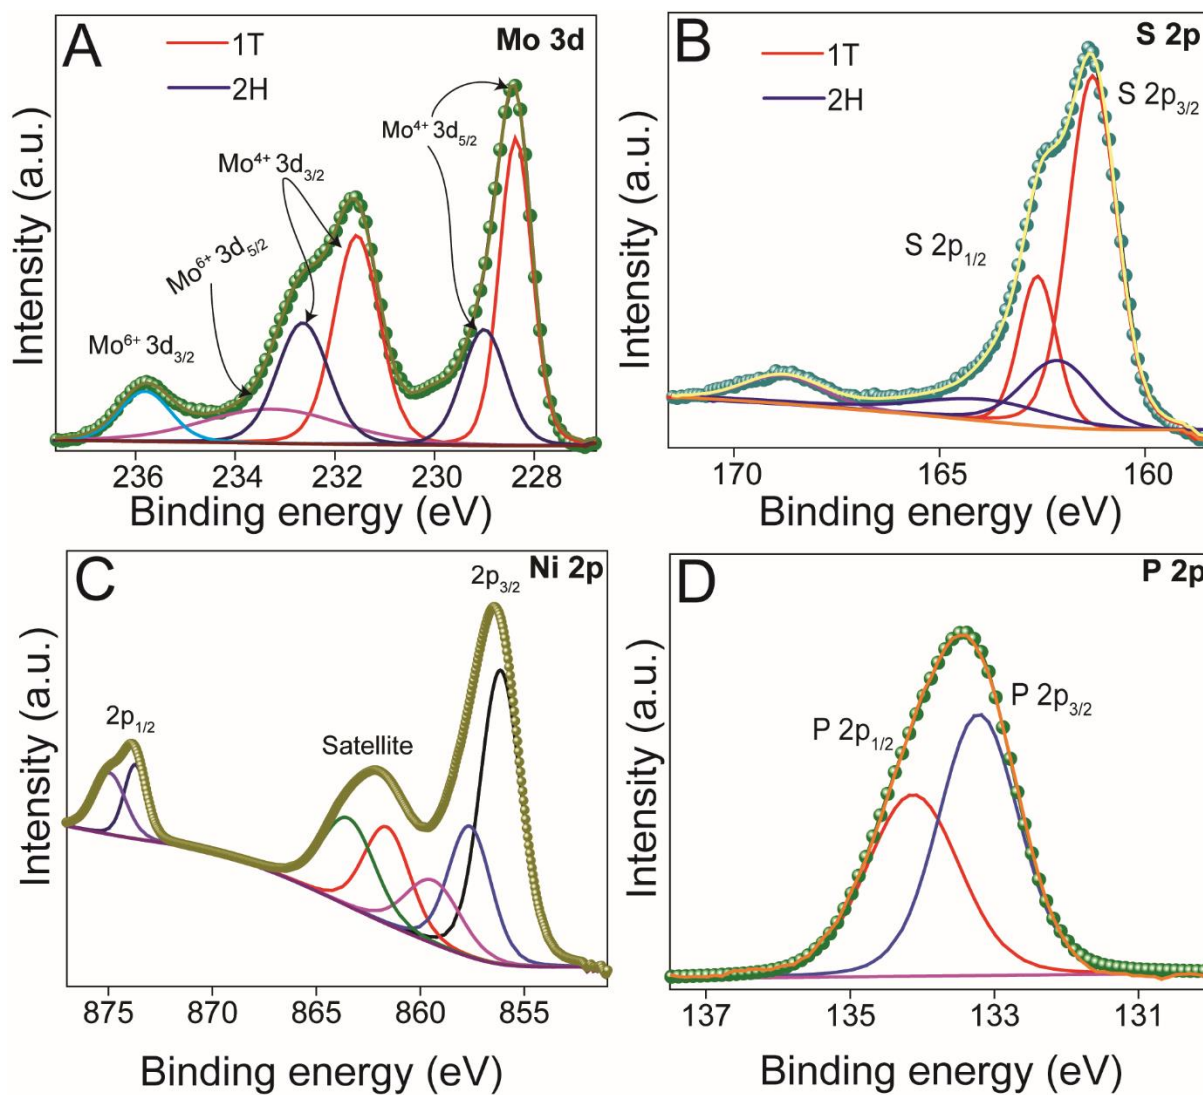

**Fig. S16.** High resolution X-ray photoelectron spectroscopy (XPS) plot of (A) Mo 3d, (B) S 2p, (C) Ni 2p, and (D) P 2p for 1T-Ni<sub>0.2</sub>Mo<sub>0.8</sub>S<sub>1.8</sub>P<sub>0.2</sub> after long-term chronoamperometric stability test.

**Table S1.** Elemental composition of the catalyst obtained from AAS and ICP-OES.

| Sample                                                                            | Technique | Mo (at. %) | S (at. %) | Ni (at. %) | P (at. %) |
|-----------------------------------------------------------------------------------|-----------|------------|-----------|------------|-----------|
| 1T-Ni <sub>0.2</sub> Mo <sub>0.8</sub> S <sub>1.8</sub> P <sub>0.2</sub><br>NFs   | AAS       | 26.9       | 59.7      | 6.8        | 6.6       |
| 1T-Ni <sub>0.2</sub> Mo <sub>0.8</sub> S <sub>1.8</sub> P <sub>0.2</sub><br>NFs   | ICP-OES   | 25.8       | 60.4      | 7.1        | 6.7       |
| 1T-Ni <sub>0.2</sub> Mo <sub>0.8</sub> S <sub>1.8</sub> P <sub>0.2</sub><br>NS/CC | AAS       | 27.1       | 59.5      | 6.5        | 6.9       |
| 1T-Ni <sub>0.2</sub> Mo <sub>0.8</sub> S <sub>1.8</sub> P <sub>0.2</sub><br>NS/CC | ICP-OES   | 26.4       | 59.9      | 6.9        | 6.8       |
| Ni <sub>0.1</sub> Mo <sub>0.9</sub> S <sub>1.8</sub> P <sub>0.2</sub>             | ICP-OES   | 30.1       | 60.4      | 3.2        | 6.3       |
| Ni <sub>0.3</sub> Mo <sub>0.7</sub> S <sub>1.8</sub> P <sub>0.2</sub>             | ICP-OES   | 22.6       | 60.7      | 9.7        | 7.0       |
| Ni <sub>0.2</sub> Mo <sub>0.8</sub> S <sub>1.7</sub> P <sub>0.3</sub>             | ICP-OES   | 26.7       | 56.4      | 6.7        | 10.2      |
| Ni <sub>0.2</sub> Mo <sub>0.8</sub> S <sub>1.9</sub> P <sub>0.1</sub>             | ICP-OES   | 26.4       | 63.6      | 6.6        | 3.4       |
| Ni <sub>0.1</sub> Mo <sub>0.9</sub> S <sub>1.7</sub> P <sub>0.3</sub>             | ICP-OES   | 30.2       | 56.2      | 3.4        | 10.2      |
| Ni <sub>0.1</sub> Mo <sub>0.9</sub> S <sub>1.9</sub> P <sub>0.1</sub>             | ICP-OES   | 30.1       | 63.1      | 3.3        | 3.5       |
| Ni <sub>0.3</sub> Mo <sub>0.7</sub> S <sub>1.7</sub> P <sub>0.3</sub>             | ICP-OES   | 23.5       | 56.5      | 10.1       | 9.9       |
| Ni <sub>0.3</sub> Mo <sub>0.7</sub> S <sub>1.9</sub> P <sub>0.1</sub>             | ICP-OES   | 23.3       | 63.5      | 10.3       | 2.9       |

**Table S2.** Comparison table towards HER performances with recently reported catalysts.

| Catalysts                                                                      | HER overpotential (mV)<br>@ 10 mA cm <sup>-2</sup> | Reference        |
|--------------------------------------------------------------------------------|----------------------------------------------------|------------------|
| 1T-Ni <sub>0.2</sub> Mo <sub>0.8</sub> S <sub>1.8</sub> P <sub>0.2</sub> NS/CC | 55                                                 | <b>This Work</b> |
| 1T-Ni <sub>0.2</sub> Mo <sub>0.8</sub> S <sub>1.8</sub> P <sub>0.2</sub> NFs   | 99                                                 | <b>This Work</b> |
| 1T/2H MoS <sub>2</sub>                                                         | 220                                                | S1               |
| P-doped 2H-MoS <sub>2</sub>                                                    | 217                                                | S2               |
| MoS <sub>2</sub> /Mo                                                           | 198                                                | S3               |
| Defect-rich MoS <sub>2</sub>                                                   | 195                                                | S4               |
| MoS <sub>2</sub> nanodots                                                      | 248                                                | S5               |
| Co <sup>s</sup> -MoS <sub>2</sub>                                              | 220                                                | S6               |
| Co <sub>9</sub> S <sub>8</sub> @MoS <sub>2</sub>                               | 342                                                | S7               |
| MoS <sub>x</sub> flat boxes                                                    | 206                                                | S8               |
| CoMoS <sub>3</sub> hollow<br>prisms                                            | 171                                                | S9               |
| MoO <sub>x</sub> /MoS <sub>2</sub>                                             | 170                                                | S10              |

**Table S3.** Comparison table towards OER performances with recently reported catalysts.

| Catalysts                                                                      | OER overpotential (mV)          | Reference        |
|--------------------------------------------------------------------------------|---------------------------------|------------------|
| 1T-Ni <sub>0.2</sub> Mo <sub>0.8</sub> S <sub>1.8</sub> P <sub>0.2</sub> NS/CC | 286 (@ 40 mA cm <sup>-2</sup> ) | <b>This Work</b> |
| 1T-Ni <sub>0.2</sub> Mo <sub>0.8</sub> S <sub>1.8</sub> P <sub>0.2</sub> NFs   | 305 (@ 40 mA cm <sup>-2</sup> ) | <b>This Work</b> |
| MoS <sub>2</sub> -Ni <sub>3</sub> S <sub>2</sub> /NF                           | 249 (@ 10 mA cm <sup>-2</sup> ) | S11              |
| MoS <sub>2</sub> /Ni <sub>3</sub> S <sub>2</sub>                               | 218 (@ 10 mA cm <sup>-2</sup> ) | S12              |
| MoS <sub>2</sub> /Ni                                                           | 250 (@ 10 mA cm <sup>-2</sup> ) | S13              |
| Co/Ni-1T-MoS <sub>2</sub>                                                      | 235 (@ 10 mA cm <sup>-2</sup> ) | S14              |
| CoS-Co(OH) <sub>2</sub> /MoS <sub>2+x</sub>                                    | 380 (@ 10 mA cm <sup>-2</sup> ) | S15              |
| Co <sub>3</sub> O <sub>4</sub> @MoS <sub>2</sub>                               | 269 (@ 10 mA cm <sup>-2</sup> ) | S16              |
| Co <sub>9</sub> S <sub>8</sub> @MoS <sub>2</sub>                               | 342 (@ 10 mA cm <sup>-2</sup> ) | S17              |
| Ni-Fe-LDH/MoS <sub>2</sub>                                                     | 250 (@ 10 mA cm <sup>-2</sup> ) | S18              |
| MoS <sub>2</sub> /QD                                                           | 370 (@ 10 mA cm <sup>-2</sup> ) | S19              |
| FeNiO <sub>x</sub> (OH) <sub>y</sub> @MoS <sub>2</sub> /rGO                    | 240 (@ 10 mA cm <sup>-2</sup> ) | S20              |

**Table S4.** Comparison table of cell voltages for overall water splitting with some recently reported catalysts.

| Catalysts                                                                            | Cell voltages for overall water splitting (V) | Reference        |
|--------------------------------------------------------------------------------------|-----------------------------------------------|------------------|
| 1T-Ni <sub>0.2</sub> Mo <sub>0.8</sub> S <sub>1.8</sub> P <sub>0.2</sub> NS/CC (+ -) | 1.52 (@ 10 mA cm <sup>-2</sup> )              | <b>This work</b> |
| 1T-Ni <sub>0.2</sub> Mo <sub>0.8</sub> S <sub>1.8</sub> P <sub>0.2</sub> NFs (+ -)   | 1.53 (@ 10 mA cm <sup>-2</sup> )              | <b>This work</b> |
| NiSe (+ -)                                                                           | 1.63 (@ 10 mA cm <sup>-2</sup> )              | S21              |
| Ni <sub>5</sub> P <sub>4</sub> (+ -)                                                 | 1.7 (@ 10 mA cm <sup>-2</sup> )               | S22              |
| Co-P (+ -)                                                                           | 1.65 (@ 10 mA cm <sup>-2</sup> )              | S23              |
| Ni <sub>2</sub> P NPs (+ -)                                                          | 1.63 (@ 10 mA cm <sup>-2</sup> )              | S24              |
| NiFe LDH (+ -)                                                                       | 1.7 (@ 10 mA cm <sup>-2</sup> )               | S25              |
| Ni <sub>0.9</sub> Fe <sub>0.1</sub> /NC (+ -)                                        | 1.64 (@ 10 mA cm <sup>-2</sup> )              | S26              |
| MoS <sub>2</sub> /Ni <sub>3</sub> S <sub>2</sub> (+ -)                               | 1.56 (@ 10 mA cm <sup>-2</sup> )              | S27              |
| Co <sub>0.7</sub> Fe <sub>0.3</sub> P/CNTs (+ -)                                     | 1.49 (@ 10 mA cm <sup>-2</sup> )              | S28              |
| Co-MoS <sub>2</sub> /BCCF-21 (+ -)                                                   | 1.55 (@ 10 mA cm <sup>-2</sup> )              | S29              |
| Ni@NC-800 (+ -)                                                                      | 1.62 (@ 10 mA cm <sup>-2</sup> )              | S30              |
| CoP/NCNHP (+ -)                                                                      | 1.64 (@ 10 mA cm <sup>-2</sup> )              | S31              |
| CoS-Co(OH) <sub>2</sub> /MoS <sub>2+x</sub> (+ -)                                    | 1.58 (@ 10 mA cm <sup>-2</sup> )              | S32              |
| Co <sub>3</sub> O <sub>4</sub> @MoS <sub>2</sub> (+ -)                               | 1.59 (@ 10 mA cm <sup>-2</sup> )              | S33              |
| CoMoNiS-NF-31 (+ -)                                                                  | 1.54 (@ 10 mA cm <sup>-2</sup> )              | S34              |
| MoS <sub>2</sub> /NiCoS (+ -)                                                        | 1.50 (@ 10 mA cm <sup>-2</sup> )              | S35              |
| Co/Ni-T-MoS <sub>2</sub> (+ -)                                                       | 1.44 (@ 10 mA cm <sup>-2</sup> )              | S14              |

## References

- 1 Z. Liu, Z. Gao, Y. Liu, M. Xia, R. Wang and N. Li, *ACS Appl. Mater. Interfaces*, 2017, **9**, 25291–25297.
- 2 X. Huang, M. Leng, W. Xiao, M. Li, J. Ding, T. L. Tan, W. S. V. Lee and J. Xue, *Adv. Funct. Mater.*, 2017, **27**, 1604943.
- 3 J. Li, J. Kang, Q. Cai, W. Hong, C. Jian, W. Liu and K. Banerjee, *Adv. Mater. Interfaces*, 2017, **4**, 1–7.
- 4 J. Benson, M. Li, S. Wang, P. Wang and P. Papakonstantinou, *ACS Appl. Mater.*



- Interfaces*, 2015, **7**, 14113–14122.
- 5 D. Gopalakrishnan, D. Damien and M. M. Shaijumon, *ACS Nano*, 2014, **8**, 5297–5303.
  - 6 Y. Li, J. Wang, X. Tian, L. Ma, C. Dai, C. Yang and Z. Zhou, *Nanoscale*, 2016, **8**, 1676–1683.
  - 7 J. Bai, T. Meng, D. Guo, S. Wang, B. Mao and M. Cao, *ACS Appl. Mater. Interfaces*, 2018, **10**, 1678–1689.
  - 8 L. Yu, B. Y. Xia, X. Wang and X. W. Lou, *Adv. Mater.*, 2016, **28**, 92–97.
  - 9 C. Wu, B. Liu, J. Wang, Y. Su, H. Yan, C. Ng, C. Li and J. Wei, *Appl. Surf. Sci.*, 2018, **441**, 1024–1033.
  - 10 G. Zhang, Y. S. Feng, W. T. Lu, D. He, C. Y. Wang, Y. K. Li, X. Y. Wang and F. F. Cao, *ACS Catal.*, 2018, **8**, 5431–5441.
  - 11 Y. Yang, K. Zhang, H. Lin, H.C. Chan, L. Yang, and Q. Gao, *ACS Catal.*, 2017, **7**, 2357–2366.
  - 12 J. Zhang, T. Wang, D. Pohl, B. Rellinghaus, R. Dong, S. Liu, X. Zhuang and X. Feng, 2016, **55**, 6702–6707.
  - 13 K. Yan and Y. Lu, *Small*, 2016, **12**, 2975–2981.
  - 14 H. Li, S. Chen, X. Jia, B. Xu, H. Lin, H. Yang, L. Song and X. Wang, *Nat. Commun.*, 2017, **8**, 1–11.
  - 15 T. Yoon and K. S. Kim, *Adv. Funct. Mater.*, 2016, **26**, 7386–7393.
  - 16 J. Liu, J. Wang, B. Zhang, Y. Ruan, H. Wan, X. Ji, K. Xu, D. Zha, L. Miao and J. Jiang, *J. Mater. Chem. A*, 2018, **6**, 2067–2072.
  - 17 M. S. Islam, M. Kim, X. Jin, S. M. Oh, N. S. Lee, H. Kim and S. J. Hwang, *ACS Energy Lett.*, 2018, **3**, 952–960.
  - 18 B. Mohanty, M. Ghorbani-Asl, S. Kretschmer, A. Ghosh, P. Guha, S. K. Panda, B. Jena, A. V. Krashennnikov and B. K. Jena, *ACS Catal.*, 2018, **8**, 1683–1689.
  - 19 C. G. Morales-Guio, L. Liardet, M. T. Mayer, S. D. Tilley, M. Grätzel and X. Hu, *Angew. Chemie - Int. Ed.*, 2015, **54**, 664–667.
  - 20 F. Zhou, X. Zhang, R. Sa, S. Zhang, Z. Wen and R. Wang, *Chem. Eng. J.*, 2020, **397**, 125454.
  - 21 C. Tang, N. Cheng, Z. Pu, W. Xing and X. Sun, *Angew. Chemie - Int. Ed.*, 2015, **54**, 9351–9355.
  - 22 M. Ledendecker, S. Krickcalderön, C. Papp, H. P. Steinrück, M. Antonietti and M. Shalom, *Angew. Chemie - Int. Ed.*, 2015, **54**, 12361–12365.
  - 23 N. Jiang, B. You, M. Sheng and Y. Sun, *Angew. Chemie - Int. Ed.*, 2015, **54**, 6251–6254.
  - 24 L. A. Stern, L. Feng, F. Song and X. Hu, *Energy Environ. Sci.*, 2015, **8**, 2347–2351.
  - 25 J. Luo, J. H. Im, M. T. Mayer, M. Schreier, M. K. Nazeeruddin, N. G. Park, S. D. Tilley, H. J. Fan and M. Grätzel, *Science*, 2014, **345**, 1593–1596.

- 26 X. Zhang, H. Xu, X. Li, Y. Li, T. Yang and Y. Liang, *ACS Catal.*, 2016, **6**, 580–588.
- 27 Y. Yang, K. Zhang, H. Lin, X. Li, H. C. Chan, L. Yang and Q. Gao, *ACS Catal.*, 2017, **7**, 2357–2366.
- 28 X. Zhang, X. Zhang, H. Xu, Z. Wu, H. Wang and Y. Liang, *Adv. Funct. Mater.*, 2017, **27**, 1–12.
- 29 Q. Xiong, Y. Wang, P. F. Liu, L. R. Zheng, G. Wang, H. G. Yang, P. K. Wong, H. Zhang and H. Zhao, *Adv. Mater.*, 2018, **30**, 1–7.
- 30 X. Ge, L. Chen, L. Zhang, Y. Wen, A. Hirata and M. Chen, *Adv. Mater.*, 2014, **26**, 3100–3104.
- 31 Y. Pan, K. Sun, S. Liu, X. Cao, K. Wu, W. C. Cheong, Z. Chen, Y. Wang, Y. Li, Y. Liu, D. Wang, Q. Peng, C. Chen and Y. Li, *J. Am. Chem. Soc.*, 2018, **140**, 2610–2618.
- 32 H. Lin, H. Li, Y. Li, J. Liu, X. Wang and L. Wang, *J. Mater. Chem. A*, 2017, **5**, 25410–25419.
- 33 Y. Luo, X. Li, X. Cai, X. Zou, F. Kang, H. M. Cheng and B. Liu, *ACS Nano*, 2018, **12**, 4565–4573.
- 34 Y. Yang, H. Yao, Z. Yu, S. M. Islam, H. He, M. Yuan, Y. Yue, K. Xu, W. Hao, G. Sun, H. Li, S. Ma, P. Zapol and M. G. Kanatzidis, *J. Am. Chem. Soc.*, 2019, **141**, 10417–10430.
- 35 C. Qin, A. Fan, X. Zhang, S. Wang, X. Yuan and X. Dai, *J. Mater. Chem. A*, 2019, **7**, 27594–27602.
